# Supplementary material for: Polyaniline modified magnetic nanoparticles coated with dicationic ionic liquid for effective removal of rhodamine B (RB) from aqueous solution
Source: PubMed Central journal article supplement (PMC9086441; doi:10.1039/c8ra06687f), 2018-09-26
Supplement: RA-008-C8RA06687F-s001.pdf [file RA-008-C8RA06687F-s001.pdf]

## List of Supporting Information

**Fig. S1**  $^1\text{H}$  NMR interpretation proposed structure of dicationic ionic liquids.

**Fig. S2** TEM analysis 100 nm of (a) native MNP, (b) MNP-PANI, (c) MNPPANI-DICAT and particle diameter distributions (d) native MNP, (e) MNP-PANI, and (f) MNP-PANI-DICAT.

**Fig. S3** Scanning wavelength for effect of time on RB (a) MNP, (b) MNP-PANI and (c) MNP-PANI-DICAT.

**Table S1** Main IR frequency with assignments and  $^1\text{H}$  NMR chemical shift ( $\delta$ ) of dicationic ionic liquid.

**Table S2** Weight loss profiles for TGA analysis of MNPs, MNP-PANI and MNP-PANI-DICAT.

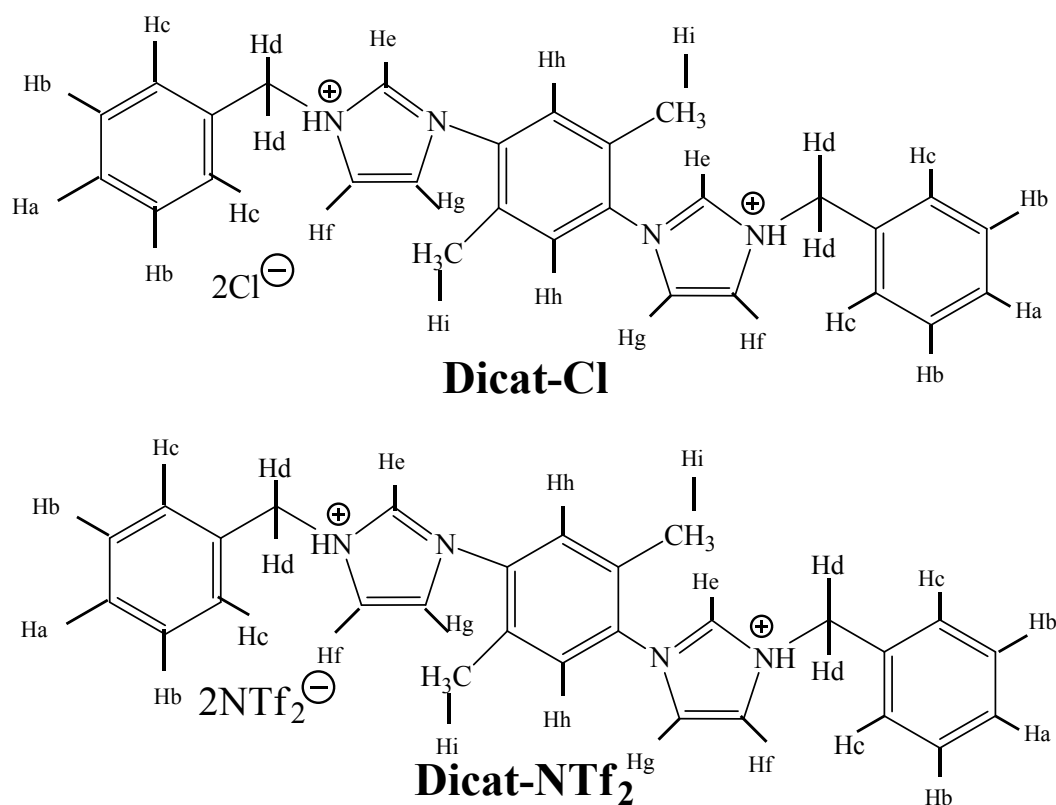

**Fig. S1**  $^1\text{H}$  NMR interpretation proposed structure of dicationic ionic liquids.

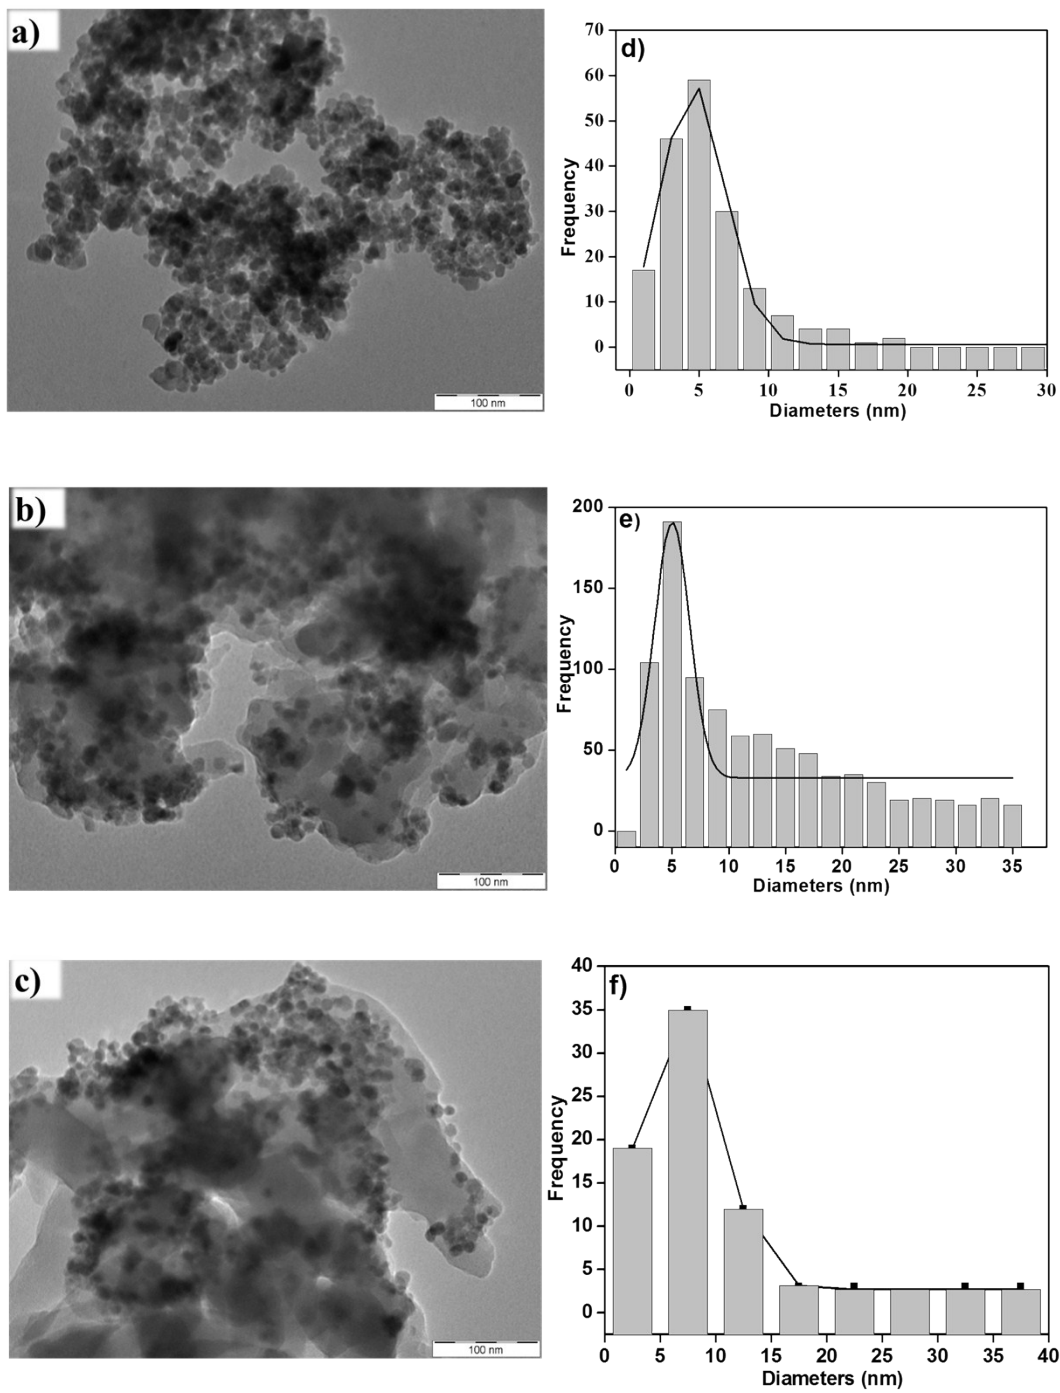

**Fig. S2** TEM analysis 100 nm of (a) native MNP, (b) MNP-PANI, (c) MNP-PANI-DICAT and particle diameter distributions (d) native MNP, (e) MNP-PANI, and (f) MNP-PANI-DICAT.

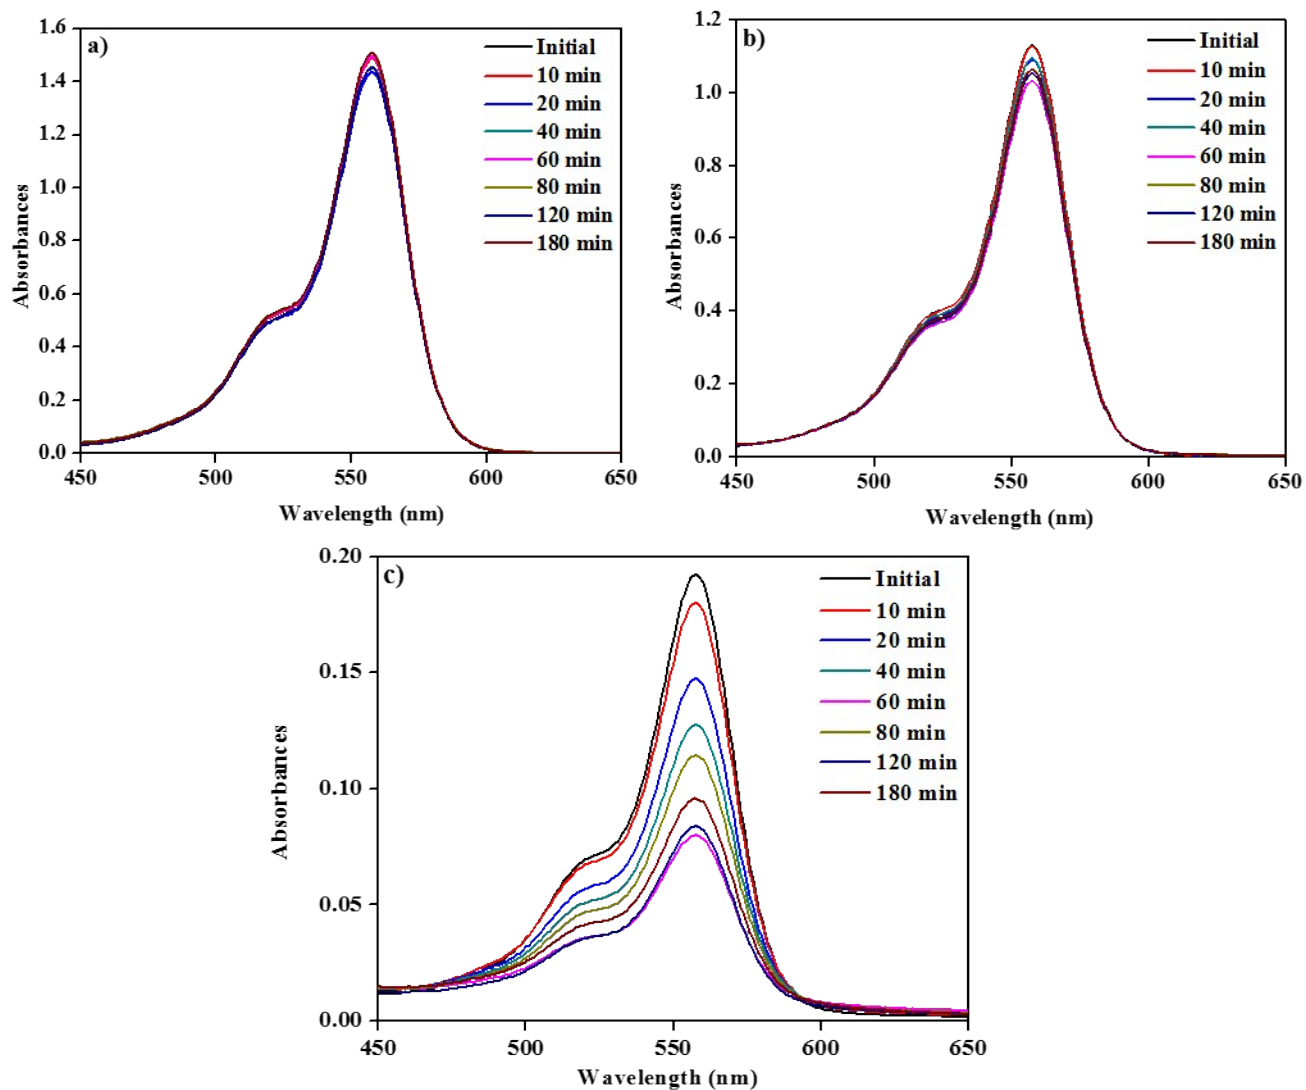

**Fig. S3** Scanning wavelength for effect of time on RB (a) MNP, (b) MNP-PANI and (c) MNP-PANI-DICAT.

**Table S1** Main IR frequency with assignments and <sup>1</sup>H NMR chemical shift (δ) of dicationic ionic liquid.

| <b>Assignments:</b>      | <b>DICAT-Cl</b>                 | <b>DICAT-NTf<sub>2</sub></b> |
|--------------------------|---------------------------------|------------------------------|
|                          | Wavenumber (cm <sup>-1</sup> ): |                              |
| N-H stretching           | 3444.71                         | 3627.21                      |
| C=C aromatic ring        | 1647.15                         | 1634.09                      |
| -CH <sub>2</sub>         | 1458.54                         | 1455.98                      |
| -CH <sub>3</sub>         | 1353.42                         | 1353.62                      |
| C-C aromatic ring        | 1506.50                         | 1515.93                      |
| C-N aromatic ring        | 1233.43                         | 1201.31                      |
| -Cl                      | 715.64                          | -                            |
| <b>Proton (Changes):</b> | Chemical shift (δ)              |                              |
| Ha (+0.019)              | 7.077                           | 7.096                        |
| Hb (+0.079)              | 7.111                           | 7.190                        |
| Hc (+0.025)              | 7.061                           | 7.086                        |
| Hd (+0.031)              | 5.030                           | 5.061                        |
| He (+0.194)              | 7.461                           | 7.655                        |
| Hf (-0.007)              | 7.006                           | 6.999                        |
| Hg (+0.031)              | 7.080                           | 7.111                        |
| Hh (+0.030)              | 6.819                           | 6.849                        |
| Hi (+0.010)              | 2.217                           | 2.227                        |

**Table S2** TGA analysis of MNPs, MNP-PANI and MNP-PANI-DICAT

| <b>Sample</b>         | <b>Region (°C)</b> | <b>Weight loss (%)</b> | <b>Assignment</b>            |
|-----------------------|--------------------|------------------------|------------------------------|
| <b>MNPs</b>           | (35 – 129)         | 2.3                    | Water loss/ moisture         |
| <b>MNP-PANI</b>       | (42 – 126)         | 7.9                    | Water loss/ moisture         |
|                       | (362 – 688)        | 67.8                   | Aniline polymer              |
| <b>MNP-PANI-DICAT</b> | (43 – 102)         | 6.8                    | Water loss/ moisture         |
|                       | (364 – 739)        | 66.6                   | Imidazolium, Aniline polymer |
